# Supplementary material for: 23196 阪神・淡路大震災によるRC造集合住宅の被害分析-非構造壁の影響
Source: Royal Society of Chemistry journal article supplement (doi:10.1039/c9ra10732k), 1996-07-30
Supplement: c9ra10732k1.pdf [file c9ra10732k1.pdf]

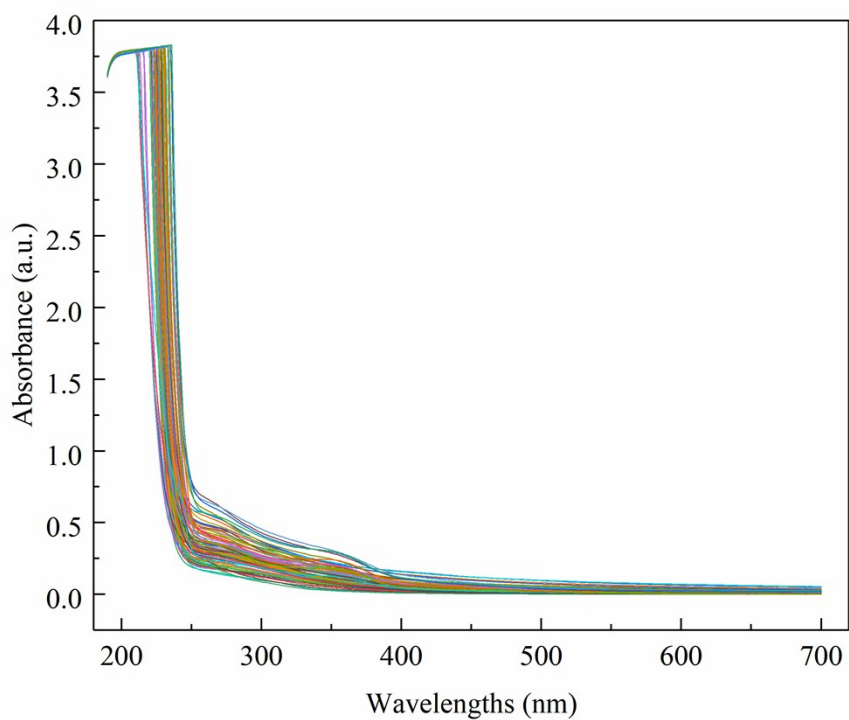

**Fig. S1.** Spectra of all water samples

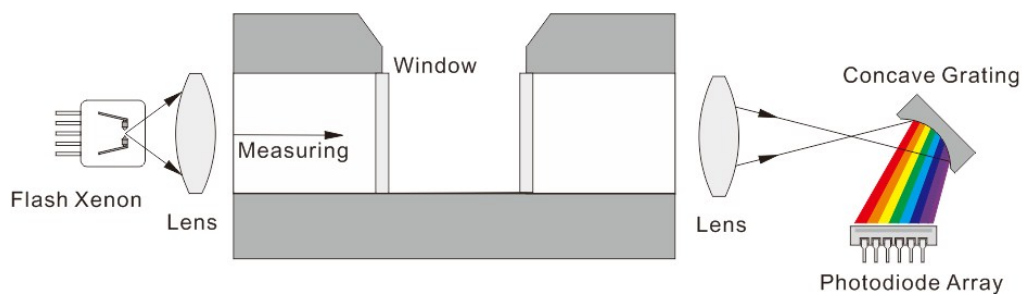

**Fig. S2.** The schematic diagram of internal structure of developed prototype

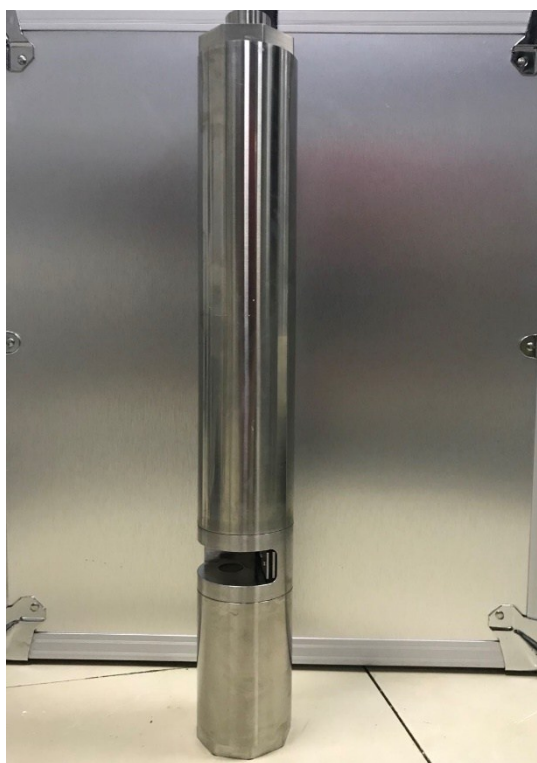

(a)

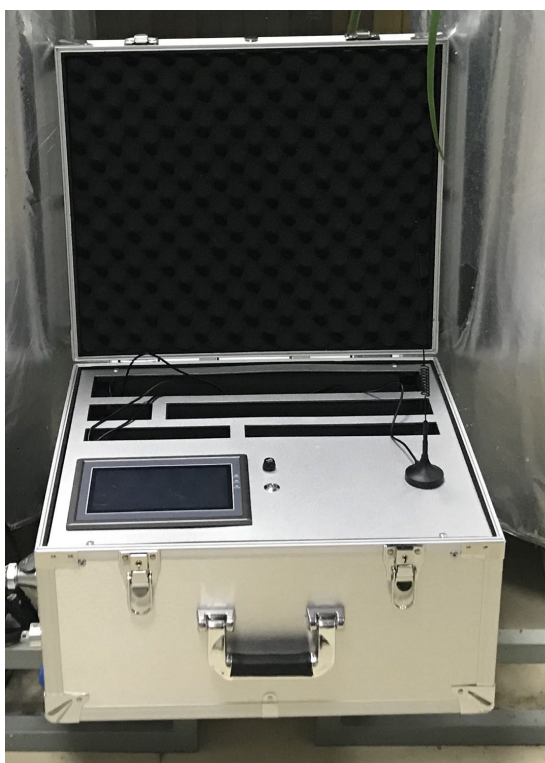

(b)

Fig S3. The photos of developed prototype  
(a) sensor; (b) wireless data transmitting module

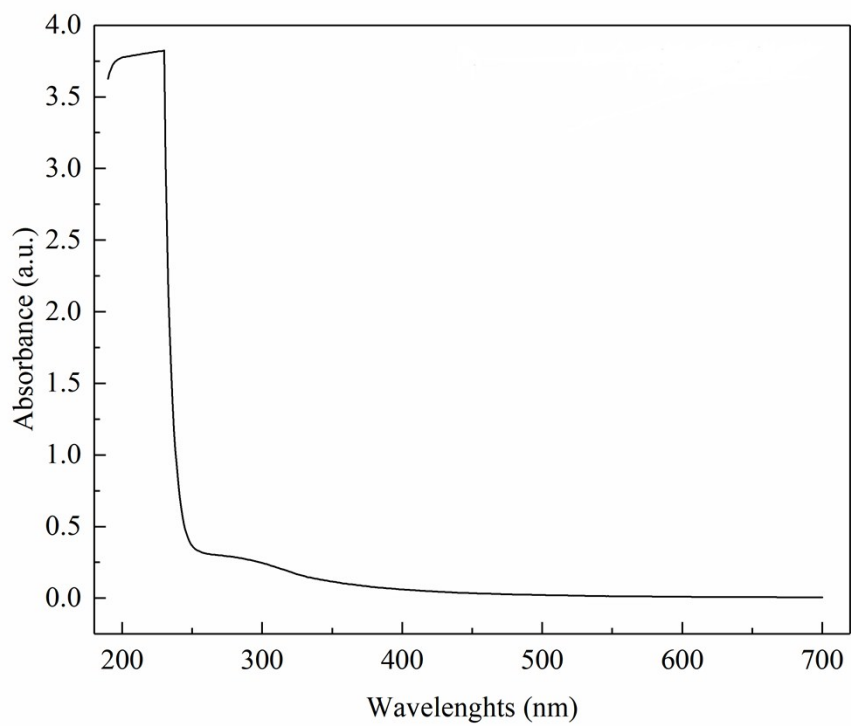

Fig S4. The UV-Vis absorbance spectra obtained by developed prototype
